# Supplementary material for: Multi-environment genomic selection in rice elite breeding lines
Source: Research Square preprint supplement (doi:10.21203/rs.3.rs-2133066/v1), 2022-10-10
Supplement: Supplementary file 1 [file f46d9a7fc8d0368a1b3758da.xlsx]

## Sheet: Readme
Multi-environment genomic selection in rice elite breeding lines Nguyen V. H.1,2,3, Morantte R. I. Z.3, Lopena V.3, Verdeprado H.3, Murori R.3, Ndayiragije A.3, Katiyar S. 3, Islam M. R. 3, Juma R.3, Galvez H.4, Glaszmann J-C.1,2, Cobb J. N. 3,5, Bartholomé J.2,6,7* 1 CIRAD, UMR AGAP Institut, F-34398, Montpellier, France 2 UMR AGAP Institut, Univ Montpellier, CIRAD, INRAE, Institut Agro, Montpel…

## Sheet: Table S1
Table S1 Composition of the elite core panel (ECP) used in this study
GID	DESIGNATION	DERIVATIVE NAME	LINE NAME	OTHER NAME	PARENTAGE
1133741	IR03A568	IR 77734-93-2-3-2	IR03A568		IRRI 145/PSB RC 18 (IR 51672-62-2-1-1-2-3)//IRRI 145
1201260	IRRI 193	IR 77498-47-2-6-2-3	IR 04A115	IR 04A115. IR 77498-47-2-6-2-3	IR68077-82-2-2-2-3/IR00A117
1253957	IRRI 180	IR 78585-98-2-2-1	IR 04A429	IR04A429. IR 78585-98-2-2-1	IR 73718-1-2-1-3/PSB RC 10 (IR 50404-57-2-2-3)
1253961	IR04A428	IR 78585-64-2-4-3	IR04A428		IR 73718-1-2-1-3/PSB RC 10 (IR 50404-57-2-2-3)
1384968	IR05N359	IR 79515-25-1-6-1	IR05N359		IR 72158-11-5-2-3/IR 72903-121-2-1-2
1401800	IR05N341	IR 79504-48-1-6-2	IR05N341		IR 73707-56-5-1-2/IR 73707-45-3-2-3
1960929	IRRI 186	IR 80897-84-2-2-1	IR 06A150	IR06A150	IR02A127/IR 64
2337754	IR08N134	IR 82489-7-2-2-2	IR08N134		IR 72967-12-2-3/PR 31090-33-2-1
2433533	IR09A228				PR 29232-B-17-2-1-1/IR 64
2451001	IR09N516	IR 83343-44-3-3-2	IR09N516		IRRI 143/NSIC RC 158
2451117	IR09A235	IR 83730-19-3-1-3	IR09A235		IR 77429-38-69-B-6-1-1/NSIC RC 138//IR 55423-01 (NSIC RC 9)
2472106	IR09A225			IR99993-B-B RGA-B RGA-B RGA-84	IR 72903-121-2-1-2/IR 71606-1-1-4-2-3-1-2 (NSIC 110
2642849	IR09M120	IR 84749-219-1-1-2	IR09M120		IR 75862-206-2-8-3-B-B-B/IR 64
2696701	IR10N271	IR 85627-96-3-3-1	IR10N271		IR01W106/IR 71676-90-2-2
2697231	IR 10A135				IRRI 174/JANAKI
2697338	IR10N237	IR 85154-84-3-3-2-3	IR10N237		IR01N111/IRRI 164//IR 72890-81-3-2-2
2697419	IR10A107	IR 85134-141-2-3-2-3	IR10A107		IR 66/IR 72870-19-2-2-3//BR 29
2697451	IR10N134	IR 84057-B2-93-1-2-3-1	IR10N134		IRRI 143/NSIC RC 158//IR 60
2697797	IR10N230	IR 85151-140-1-2-3-3	IR10N230		IR01N106/IR01N194//IRRI 143
2858722	IR10A231	IR 85827-18-2-1-2-3	IR10A231		IRRI 143/IR 73718-23-2-1-3//IR00A110
2971736	IR11N121	IR 87079-90-1-3-2-2	IR11N121		IR05N341/IR 64680-81-2-2-1-3//PSB RC 10 (IR 50404-57-2-2-3)
2972293	IR11A293	IR 87529-6-1-2-1	IR11A293	IR16A1957	IR04A427/IR 69726-116-1-3 (MATATAG 1)
2972309	IR11A297	IR 87529-120-3-1-2	IR11A297		IR04A427/IR 69726-116-1-3 (MATATAG 1)
2972722	IR11A341	IR 87542-86-2-2-1	IR11A341		IR05A125/CIHERANG
2972796	IR11N202	IR 87546-42-3-2-3	IR11N202		IR05N173/BR 29
300034581	IR98380-B-B-B-B-55			IR15A2246	IRRI 168/IRRI 123
300035917	IR15A2343			IR98430-B-B-B-B-11	IR09N190/IRRI 123
300038124	IR15A2373	IR 100120-B-B-B-B-11	IR15A2373		PR 37866-1B-1-4/NSIC RC 158
300038265	IR100121-B-B-B-B-72			IR15A2383	PR 37866-1B-1-4/IRRI 154
300038266	IR100121-B-B-B-B-73			IR15A2384	PR 37866-1B-1-4/IRRI 154
300038744	IR15A2401	IR 99982-B-B-B-B-1	IR15A2401		IR04A115/PSB RC 10 (IR 50404-57-2-2-3)
300038775	IR99982-B-B-B-B-32			IR99982-B-B-B-B-32	IR04A115/PSB RC 10 (IR 50404-57-2-2-3)
300039577	IR15A2442	IR 99047-B-B-B-B-47	IR15A2442		IR04A429/IR 68144-2B-2-2-3-1-166//IR09N496
300040799	IR15A2535			IR99107-B-B-B-B-27	MTU 1113/IR06M139//IR07A234
300041295	IR15A2619			IR100723-B-B-B-B-7	IR08N194/IR10F365//PR 37285-17-31-12-1-21-1-2
300041329	IR100723-B-B-B-B-41				IR08N194/IR10F365//PR 37285-17-31-12-1-21-1-2
300080502	IR15A2829				12DS-GMET-22/IRRI 156
300080634	IR15A2878				PR 36921-B-6-1-3-4/IRRI 154//IR09A228
300166640	IR 122310:7-2-2	IR 122310:7-2-2			IR 120763:2/IRRI 156
300166641	IR 122310:7-5-6				IR 120763:2/IRRI 156
300170400	IR15F2010				IR09F120/IR04A285
300172737	IR15A3449				IRRI 154/IR04A213//PAU 201
300173154	IR15A3595				IR08N194/IR08N128//IR06A150
300174086	IR15A3780				PR 37285-17-31-12-1-21-1-2/IRRI 154
300174380	IR15A3855				PR 37285-17-31-12-1-21-1-2/IRRI 123
300233098	IR16A1957	IR 103733-B-B-B-B-1	IR16A1957		IR09A136/IR10M108//PSB RC 10 (IR 50404-57-2-2-3)
300233776	IR106432-B-B-B-B-25			IR16A1446	GSR IR 1-8-S6-S3-Y2/PR 39421-52-28-2-1//IR09A228
300252036	IR 93346:1-B-13-7-6-1RGA-2RGA-1-B	IR 93346:1-B-13-7-6-1RGA-2RGA-1-B		IR 93346	FEDEARROZ 50/SANHUANGZHAN NO 2//IRRI 123/NSIC RC 158///IR 77298-14-1-2-10/IR 4630-22-2-5-1-3//IR 45427-2B-2-2B-1-1/IR07F287
300258387	IRRI 174	IR 78119-24-1-2-2-2	IR 04A285		IR00A117/IR 64
300266828	IR12A329	IR 91051-102-1-2-2	IR12A329		IRRI 154/BR 29
300266831	IR13N115	IR 92586-11-3-1-1	IR13N115		IR01A111/MTU 1010//NSIC RC 158
300266832	IR13N131	IR 92328-7-1-3-2	IR13N131		CIHERANG/IR08N158
300266835	IR13A107	IR 92445-8-1-1-2	IR13A107		OM 4900/IR04A428
300266839	IR10F559	IR 88228-33-3-5-2	IR10F559		IR 80410-B-197-4/IRRI 149//NSIC RC 158
300266846	IR12A229	IR 91098-69-3-3-1	IR12A229		IR06M146/IR 72102-4-159-1-3-3-3 (NSIC RC 112)
300266848	IR12A282	IR 92240-40-2-2-1	IR12A282		IR03A550/TEQING
300279864	IR11N313	IR 89197-128-2-1-2	IR11N313	IR 89197-128-2-1-2	IR05N173/IRRI 143//IR 67966-44-2-3-2
300279868	IR 11A306				IR04A427/IR 73006-12-3-3-2
300287234	IR16A2332	IR 100842-B-B RGA-B RGA-B RGA-9	IR16A2332		PSBRC 82/IR10F379//IR10F290
300293456	IR16A2261	IR 99993-B-B RGA-B RGA-B RGA-1	IR16A2261		IRRI 151/IRRI 154
300293539	IR99993-B-B RGA-B RGA-B RGA-84				IRRI 151/IRRI 154
300293562	IR16A2055			IR99993-B-B RGA-B RGA-B RGA-107	IRRI 151/IRRI 154
300294018	IR16A1070	IR 100097-B-B RGA-B RGA-8	IR16A1070		IR10N108/IRRI 154
300294074	IR16A1131	IR100097-B-B RGA-B RGA-64		IR16A1131	IR10N108/IRRI 154
300294080	IR100097-B-B RGA-B RGA-70			IR16A1105	IR10N108/IRRI 154
300296708	IR16A2225	IR 108005-B-B RGA-B RGA-1	IR16A2225		PR 37704-2B-6-1-2-1-1/IRRI 154
300431704	IR16A2716			IR 07995-B-B RGA-B RGA-64-1	PR 35786-B-3-3-2-1-1/IRRI 154
300764175	IR 54447-3B-10-2	IR 54447-3B-10-2			BKNFR 76106-16-0-1/IR 9764-45-2-2//IR 50404/NONA BOKRA
300764179	IR15M1289	IR 99282-5-3-1	IR15M1289		IR 91145-AC 26/IRRI 123//OM 4498///IR 58/4/IR 69428-6-1-1-3-3/IR 69807-13-2-1//IR 58
300764184	IR10M210	IR 84847-RIL 195-1-1-1-1	IR10M210		IRRI 123/IR 68144-2B-2-2-3-1-127
3022947	IR11A282	IR 87527-119-1-2-4	IR11A282		IR04A427/BR 29
3173051	IR09A130	IR 83850-14-3-2-3	IR 09A130		IR 77080-B-34-3/IR 71606-1-1-4-2-3-1-2 (NSIC 110
3272808	IR12N135	IR 90233-98-2-1-2	IR12N135		IR01N149/IR 64680-81-2-2-1-3//FEDEARROZ 50
3423716	IR12A136	IR 90242-5-1-1-1-2	IR12A136
3425601	IR12N252	IR 90229-68-1-3-3-1	IR12N252		IR 72971-77-1-5-2-2/IR02W101//NERICA 6
3425772	IR12N165	IR 91002-12-3-1-1	IR12N165		FEDEARROZ 50/IR07F289
3425923	IR12A173	IR 91048-72-2-3-5	IR12A173		IR03A550/MTU 1010
3426973	IR12N231	IR 92239-13-3-2-2	IR12N231		IR02N211/TEQING
3427347	IR12A311	IR 92278-125-1-3-3	IR12A311		IR 80559 B/IR 60819-34-2 R
3523215	IR12N249	IR 90223-2-3-3-2-2	IR12N249		IR05N204/IR01W102//IRRI 145
3523254	IR12N146			IR 90228-1-3-3-3-2	IR 72890-81-3-2/NSIC RC 158//IRRI 154
3592078	IR13N134	IR 92339-6-3-3-3	IR13N134		IR04A213/IR09N494
3592657	IR13N152	IR 92413-2-3-3-3	IR13N152		IR 83704-31-3-3-2/IR09N529
3593039	IR13A153	IR 92644-82-3-2-1	IR13A153		IR06M146/IR 72102-4-159-1-3-3-3 (NSIC RC 112)//OM 4498
3658769	IR13N102	IR 92385-11-3-3-1	IR13N102		IR 83317-50-1-2-2/IR 71700-247-1-1-2
3806774	IR13N157	IR 93651-42-2-1-3	IR13N157		IR09N531/IRRI 154
3806855	IR13A514	IR 93640-68-3-2-3	IR13A514		IR09M127/CIHERANG
4016512	IRRI 154	IR 78581-12-3-2-2	IR 04A421		IR 73012-137-2-2-2/PSB RC 10 (IR 50404-57-2-2-3)
4016513	IRRI 156	IR 78555-68-3-3-3	IR 04A395		IR 72870-102-2-2-1-3/IR 72870-19-2-2-3
4189053	IR12M112	IR 90241-72-1-1-3-2	IR12M112		IR 75862-206-2-8-3-B-B-B/IRRI 123//IRRI 154
4193103	IR14F711	IRRI 154*2/IRRI 149	F2	IR14F711	IRRI 154*2/IRRI 149
4214820	IR 99054-B-B-1	IR 99054-B-B-1			IR10M101/IR 73006-12-3-3-2//PAU 3105-45-3-2
4220423	IR 105469:72-18-2	IR 105469:72-18-2			IR 6 (PAKISTAN)*2/IRRI 149
4226523	IR 110615-C1-B-B-B-1-1	IR 110615-C1-B-B-B-1-1			IR 85483-68 RIL-1-1-1/IRRI 150
4228888	IR14N153	IR 94077-97-3-3-1-1	IR14N153		IR04N155/IR09N534//IR02W101
4228927	IR14A150	IR 95450-69-1-2-1	IR14A150		IR03A550/IRRI 154
4228929	IR14A193				IR03A550/IRRI 154
4229118	IR14A185	IR 96834-38-3-1	IR14A185		IR BB 66/IR03A550
4229178	IR14A216	IR 97288-86-1-1	IR14A216		MTU 1115/IR 65482-4-136-2-2-B//IR09A131
4535979	IR15D110				IRRI 154/MA ZHAN (RED)//IR08N194
4609623	IR15A4029	IR 107051:15-1-1	IR15A4029		IR 103806:237/IRRI 154
4609631	IR 107041:36-1-1				IR 103806:139/IRRI 154
4789033	IR16A2834				PR 37246-2-3-2-1-1-2-1/IR10F365
4789041	IR16A2836				PR 37246-2-3-2-1-1-2-1/IR10F365
4789051	IR16A2841				PR 37246-2-3-2-1-1-2-1/IR10F365
4789056	IR16A2844				PR 37246-2-3-2-1-1-2-1/IR10F365
4789719	IR16A3082				PR 36921-B-6-1-3-4/IRRI 154//IR09A228
4789765	IR16A3123				PR 36921-B-6-1-3-4/IRRI 154//IR09A228
4789819	IR16A3095				PR 36921-B-6-1-3-4/IRRI 154//IR09A228
4815752	IR16A3524				IR05N412/PR 37921-B-3-2-2//IR05N412
4815880	IR16A3652

## Sheet: Table S2
Table S2 Information on each field trial's locations and technical parameters
No. trial	Country	Location	Year	Season	Short name of environments	N latitude	E longitude	Establishment (Transplanting or direct-seeding)	Design	No. REP	No. lines within each experiment	No. ECP	No. ECP genotyped	No. checks	Rows distance	Hills distance	Rows number	Hills number	Plots size (m²)	Seeding date	Transplating date	First lines flowered of 50%	Last lines flowered of 50%	Harvesting date
1	Bangladesh	Gazipur	2019	Wet	BD-GZ-19W	23.9905	90.4019	Transplanting	P-REP	27% lines replicated	105	93	90	9	20	20	5	27	2021-04-05	2019-07-08	2019-07-25	2019-09-20	2019-10-21	2019-11-05
2	Bangladesh	Nizmawna	2019	Wet	BD-NM-19W	24.2548	90.3018	Transplanting	Systematic arrangement	1	102	93	90	6	20	20	5	27	2021-04-05	2019-07-11	2019-08-04	2019-09-24	2019-10-24	2019-11-10
3	India	Hyderabad	2018	Wet	IN-HY-18W	17.5128	78.2744	Transplanting	RCBD	2	58	39	37	4	15	20	6	15	2021-07-02	2018-07-17	2018-08-13	2018-10-20	2018-11-11	2018-11-27
4	India	Cuttack	2019	Wet	IN-CU-19W	20.4475	85.9399	Transplanting	RCBD	2	67	40	38	11	20	15	6	24	4.32	2019-07-10	2019-08-09	2019-10-01	2019-10-25	2019-11-19
5	India	Hyderabad	2019	Dry	IN-HY-19D	17.5128	78.2744	Transplanting	RCBD	2	58	39	37	4	20	15	9	15	2021-04-05	2019-01-17	2019-02-12	2019-04-10	2019-04-27	2019-05-19
6	India	Hyderabad	2019	Wet	IN-HY-19W	17.5124	78.2754	Transplanting	Augmented RCBD	3% lines replicated	60	40	38	5	20	15	4	30	2021-06-03	2019-07-02	2019-08-16	2019-10-08	2019-10-28	2019-12-07
7	India	Maruteru	2019	Wet	IN-MA-19W	16.6302	81.7444	Transplanting	P-REP	43% lines replicated	60	40	38	4	20	15	10	14	2021-02-04	2019-07-06	2019-08-07	2019-09-28	2019-10-17	2019-11-17
8	India	Raipur	2019	Wet	IN-RP-19W	21.2514	81.6296	Transplanting	P-REP	43% lines replicated	60	40	38	5	20	15	11	13	4.29	2019-07-15	2019-08-11	2019-10-17	2019-11-11	2019-12-03
9	Kenya	Ahero	2019	Dry	KE-AH-19D	-0.1388	34.9379	Transplanting	RCBD	2	103	92	89	5	20	20	26	6	6.24	2019-08-21	2019-09-11	2019-11-03	2019-12-28	2020-01-04
10	Kenya	Mwea	2020	Wet	KE-MW-20W	-0.6489	37.2841	Transplanting	RCBD	2	101	92	89	5	20	20	5	26	2021-02-05	2020-02-24	2020-03-14	2020-05-23	2020-06-27	2020-07-19
11	Mozambique	Chokwe	2020	Wet	MZ-CK-20W	-24.5261	33.0083	Transplanting	Row-Column	2	100	93	90	3	20	20	5	25	5	2019-11-05	2019-12-12	2020-02-16	2020-03-16	2020-04-09
12	Mozambique	Maputo	2020	Wet	MZ-MP-20W	-26.4694	32.6372	Direct-seeding	Row-Column	2	100	93	90	3	20	-	5	5	5	2019-11-21	2019-11-21	2020-02-02	2020-03-29	2020-04-11
13	Philippines	Los Banos	2019	Dry	PH-LB-19D	14.1687	121.255	Transplanting	Alpha Lattice	2	210	111	107	5	20	20	6	25	6	2019-01-15	2019-02-08	2019-03-16	2019-05-04	2019-05-13
14	Philippines	Los Banos	2019	Wet	PH-LB-19W	14.1687	121.255	Transplanting	Alpha Lattice	2	210	111	107	5	20	20	12	12	5.76	2019-06-20	2019-07-09	2019-08-15	2019-10-01	2019-10-17
15	Tanzania	Dakawa	2020	Wet	TZ-DK-20W	-6.4348	37.538	Transplanting	Augmented RCBD	5% lines replicated	98	91	88	6	20	20	5	25	5	2020-03-16	2020-04-10	2020-05-31	2020-06-24	2020-08-01

## Sheet: Table S3
Table S3 Description of the statistical models used for phenotypic data analysis
Environment	Design	The factors of models used			CV (%)			SD			Phenotypic variance
											Genotype (Vg)			Residual (Ve)
		Fixed terms	Random terms	Residual structure	DTF	HT	YLD	DTF	HT	YLD	DTF	HT	YLD	DTF	HT	YLD
BD-GZ-19W	P-REP	Replication	Genotype	AR1V(rows) x AR1(columns)	2021-03-05	4.0	2021-02-04	2021-08-04	2021-09-04	0.2	26.0	40.4	0.1	2021-04-11	33.5	0.5
BD-NM-19W	Systematic arrangement	-	-	-	-	-	-	-	-	-	-	-	-	-	-	-
IN-HY-18W	RCBD	Replication	Genotype	-	2021-07-04	2021-07-07	2021-04-10	2021-09-04	2021-06-06	0.6	2021-05-26	51.0	0.5	2021-08-04	2021-04-18	0.2
IN-CU-19W	RCBD	Replication	Genotype + Rows + Columns	-	2021-04-05	2021-02-09	2021-09-16	2021-02-05	2021-06-10	0.8	2021-08-27	112.0	0.7	2021-02-01	0.1	0.1
IN-HY-19D	RCBD	Replication	Genotype	AR1V(rows) x AR1(columns)	2021-03-03	2021-06-06	2021-06-15	3.0	2021-07-05	0.9	2021-03-11	37.6	1.0	2021-04-06	2021-07-14	0.4
IN-HY-19W	Augmented RCBD	-	-	-	-	-	-	-	-	-	-	-	-	-	-	-
IN-MA-19W	P-REP	Replication	Genotype	AR1V(rows) x AR1(columns)	2021-07-03	2021-06-06	2021-01-20	2021-05-03	2021-05-08	0.8	2021-04-15	75.7	0.7	2021-08-05	2021-01-06	0.1
IN-RP-19W	P-REP	Replication	Genotype + Rows + Columns	-	2021-06-04	2021-02-07	2021-03-10	2021-09-04	2021-01-08	0.5	2021-04-26	74.1	0.5	2021-03-02	2021-06-07	0.4
KE-AH-19D	RCBD	Replication	Genotype + Rows + Columns	-	2021-03-03	2021-04-04	2021-03-07	2021-02-03	2021-04-04	0.4	2021-04-15	2021-02-28	0.3	2021-03-14	2021-09-26	0.7
KE-MW-20W	RCBD	Replication	Genotype + Rows + Columns	-	2021-02-04	2021-01-07	2021-08-12	2021-03-04	2021-01-06	0.6	2021-01-25	48.4	0.4	17.0	2021-04-21	0.3
MZ-CK-20W	Row-Column	Replication	Genotype	AR1V(rows) x AR1(columns)	2021-06-03	2021-03-07	2021-04-05	2021-02-04	2021-09-05	0.3	19.0	42.5	0.2	2021-09-01	117.2	0.6
MZ-MP-20W	Row-Column	Replication	Genotype	AR1V(rows) x AR1(columns)	2021-06-06	2021-03-08	2021-08-06	2021-01-07	2021-05-06	0.3	53.4	49.2	0.2	2021-06-14	21.0	0.2
PH-LB-19D	Alpha Lattice	Replication	Genotype	AR1V(rows) x AR1(columns)	2021-01-07	2021-05-08	2021-05-17	2021-02-06	2021-09-08	2021-01-01	40.9	90.9	2021-03-01	2021-02-06	33.1	0.5
PH-LB-19W	Alpha Lattice	Replication	Genotype	AR1V(rows) x AR1(columns)	2021-03-08	2021-02-06	2021-06-17	2021-01-07	2021-03-07	0.9	55.2	77.4	0.9	2021-05-12	76.7	0.4
TZ-DK-20W	Augmented RCBD	Replication	Genotype	AR1V(rows) x AR1(columns)	2021-05-05	2021-02-06	2021-01-11	2021-09-04	2021-05-06	0.5	2021-07-24	51.9	0.3	2021-08-01	2021-09-17	0.0
Note:	At the No. ECP. numbers contained within the brackets show the number of ECP having SNP data from the 1KRiCA dataset at each environment/experiment
	AR1. first-order autoregressive
	H²: broad-sense heritability
	SE: standard error of broad-sense heritability
	Vg: Genotypic variance
	Ve: Residual variance
	“-” at two environments of Nizmawna (Bangladesh) and Hyderabad (India) shows the broad-sense heritability was not calculated due to the experimental design without replications.

## Sheet: Table S4
Table S4 Environmental covariates (ECs) of each environment throughout the whole growing seasonfor the different phases: vegetative (VE), reproductive (RE), and ripening (RI).
Environment	Coordinate of environments		Transplating date	First lines flowered of 50%	Last lines flowered of 50%	Harvesting date	Whole growing season								Vegatative phase (VE)								Reproductive phase (RE)								_x0008_Ripen phase (RI)
	N latitude	E longitude					PP	DPT	PET	VPD	TM	TR	APAR	CPAR	PP_VE	DPT_VE	PET_VE	VPD_VE	TM_VE	TR_VE	APAR_VE	CPAR_VE	PP_RE	DPT_RE	PET_RE	VPD_RE	TM_RE	TR_RE	APAR_RE	CPAR_RE	PP_RI	DPT_RI	PET_RI	VPD_RI	TM_RI	TR_RI	APAR_RI	CPAR_RI
BD-GZ-19W	239905	904019	2019-07-25	2019-09-20	2019-10-21	2019-11-05	1121	25.15	7.35	0.56	27.45	5.74	9280	12462	690	2021-05-26	2021-07-07	0.5	2021-05-28	2021-02-05	5498	7640	286	2021-02-24	2021-01-07	0.6	2021-08-26	2021-01-06	2735	3535	150	2021-02-22	2021-05-06	0.6	2021-08-24	2021-09-06	1240	1501
BD-NM-19W	242548	903018	2019-08-04	2019-09-24	2019-10-24	2019-11-10	1054	24.76	7.21	0.58	27.22	5.66	8426	11228	542	2021-04-26	2021-09-07	0.6	2021-08-28	2021-01-05	4898	6625	321	2021-06-23	2021-07-06	0.6	2021-03-26	2021-07-05	2444	3189	270	2021-07-21	2021-07-05	0.5	24	2021-08-06	1193	1617
IN-HY-18W	175128	782744	2018-08-13	2018-10-20	2018-11-11	2018-11-27	198	17.05	8.12	1.53	25.2	11.96	9971	12181	197	2021-04-19	8	2021-03-01	2021-05-25	2021-05-10	6395	8312	0	2021-03-14	2021-06-08	2021-09-01	2021-09-24	2021-03-14	2217	2410	0	2021-03-10	2021-02-08	2021-01-02	2021-02-24	2021-02-15	1571	1673
IN-CU-19W	204475	859399	2019-08-09	2019-10-01	2019-10-25	2019-11-19	813	24.27	6.91	0.57	26.68	5.91	8388	11830	497	2021-08-25	2021-07-06	0.5	2021-08-27	2021-09-04	4324	6957	238	2021-01-24	2021-07-07	0.6	2021-06-26	6	2267	2814	121	2021-04-21	2021-06-06	0.6	2021-04-24	2021-08-07	1957	2281
IN-HY-19D	175128	782744	2019-02-12	2019-04-10	2019-04-27	2019-05-19	26	9.57	10.83	3.76	31.02	16.24	11570	12252	11	2021-09-08	2021-04-10	2021-04-03	2021-03-29	2021-08-16	6654	6948	13	2021-03-11	2021-05-11	2021-01-04	32.9	16	2299	2460	3	2021-02-10	2021-03-11	2021-05-04	34.2	2021-08-14	2857	3109
IN-HY-19W	175124	782754	2019-08-16	2019-10-08	2019-10-28	2019-12-07	353	20.25	7.38	0.79	23.91	8.72	9809	12587	284	2021-07-21	2021-06-07	0.8	2021-02-25	2021-04-07	4837	6677	58	2021-04-21	7	0.5	2021-08-23	7	1725	2284	12	2021-08-17	2021-03-07	0.9	2021-03-22	2021-02-11	3426	3840
IN-MA-19W	166302	817444	2019-08-07	2019-09-28	2019-10-17	2019-11-17	562	24.82	7.61	0.59	27.45	3.72	9264	12261	303	2021-05-25	2021-07-07	0.5	2021-08-27	2021-04-03	4892	6759	90	2021-09-24	8	0.6	2021-07-27	2021-04-03	1886	2340	189	2021-06-23	2021-02-07	0.6	2021-07-26	2021-04-04	2682	3405
IN-RP-19W	212514	816296	2019-08-11	2019-10-17	2019-11-11	2019-12-03	780	21.45	6.81	0.56	24.18	7.96	9197	12216	724	2021-08-23	2021-09-06	0.5	2021-01-26	2021-03-06	5598	8105	56	2021-09-19	2021-04-06	0.6	2021-01-23	9	1918	2400	0	2021-09-15	7	0.6	2021-07-19	2021-08-11	1863	1900
KE-AH-19D	-1388	349379	2019-09-11	2019-11-03	2019-12-28	2020-01-04	1485	16.18	9.32	0.63	20.09	8.16	13028	16165	739	16	2021-08-09	0.7	2021-04-20	2021-05-08	6387	7739	744	2021-05-16	2021-07-08	0.6	2021-08-19	2021-06-07	5889	7623	15	2021-07-15	10	0.7	2021-08-19	2021-06-09	952	1072
KE-MW-20W	-6489	372841	2020-03-14	2020-05-23	2020-06-27	2020-07-19	620	15.7	8.4	0.72	19.59	10.1	12815	16913	484	2021-07-16	2021-09-08	0.7	2021-04-20	2021-08-09	7551	9880	113	2021-02-15	8	0.7	2021-09-18	2021-01-10	3409	4467	25	2021-04-13	2021-05-07	0.8	2021-02-18	2021-01-11	2035	2813
MZ-CK-20W	-245261	330083	2019-12-12	2020-02-16	2020-03-16	2020-04-09	344	19.6	10.99	1.78	27.82	11.54	15736	18359	255	2021-02-20	2021-09-11	2021-09-01	2021-09-28	2021-07-11	9492	11061	58	2021-07-19	2021-05-10	2021-05-01	2021-07-26	2021-06-10	3771	4402	36	2021-09-17	2021-02-09	2021-07-01	2021-01-26	2021-01-12	2733	3187
MZ-MP-20W	-264694	326372	2019-11-21	2020-02-02	2020-03-29	2020-04-11	664	20.05	9.67	1.24	25.58	9.96	16317	21166	329	2021-02-20	2021-05-10	2021-04-01	2021-03-26	2021-08-10	9149	11961	325	2021-05-20	2021-04-09	1	2021-01-25	9	6323	7905	10	2021-03-17	2021-07-06	2021-02-01	2021-07-23	10	1110	1578
PH-LB-19D	141687	1212554	2019-02-08	2019-03-16	2019-05-04	2019-05-13	134	21.11	10	1.38	26.99	10.03	11027	13058	26	2021-03-20	2021-03-09	1	2021-09-24	2021-07-09	3986	4783	51	2021-03-21	2021-07-10	2021-06-01	2021-02-28	2021-06-10	6177	7149	59	2021-04-23	2021-02-09	2021-04-01	2021-09-28	2021-05-08	1089	1396
PH-LB-19W	141687	1212554	2019-07-09	2019-08-15	2019-10-01	2019-10-17	757	23.98	7.47	0.63	26.5	5.3	9104	13676	340	2021-03-24	2021-02-07	0.6	2021-07-26	2021-08-04	3347	5308	349	24	2021-02-07	0.6	2021-03-26	2021-02-05	4211	6453	70	2021-03-23	2021-06-08	0.8	2021-06-26	2021-09-06	1723	2179
TZ-DK-20W	-64348	37538	2020-04-10	2020-05-31	2020-06-24	2020-08-01	395	18.58	7.31	0.47	21.01	8.29	9947	13520	316	2021-04-20	2021-03-07	0.4	2021-03-22	7	4586	6528	13	2021-06-17	2021-05-07	0.5	2021-01-20	2021-01-09	2217	2805	72	2021-07-16	2021-02-07	0.5	2021-08-19	2021-05-09	3310	4412
PP The total precipitation (mm)
DPT Dew-point temperature at two meters (°C·d-1)
PET Potential evapotranspiration (mm·d-1)
VPD Vapour pressure deficit (kPa·d-1)
TM Mean temperature at two meters (°C·d-1)
TR Temperature range (0C·d-1)
APAR All-sky surface photosynthetically active radiation total (W·m-2)
CPAR Clear sky surface photosynthetically active radiation total (W·m-2).
The ECs such as PP, APAR, and CPAR are extracted from the sum values throughout the crop season for all environments, the rest of the ECs used the mean values for all environments.
The duration of environments is estimated from the transplanting date (starting date) to the harvesting date (ending date) of each environment.
Note:	Suffixes _VE; _RE and _RI in the following of each ECs meaning vegetative phase; reproductive phase. and ripen phase. respectively
	Vegetative phase (VE): identified begining from transplanting date up to the date of the first ECP flowered of 50%
	Reproductive phase (RE): identified being the interval time between the first ECP and the last ECP are flowered of 50%
	Ripen phase (RI): identified starting from the date of the last ECP flowered of 50% up to harvesting date

## Sheet:  Table S5
Table S5 List of environments selected for the CV-SEL scenario.
Targeted environments (15)	Selected environments
	Env1	Env2	Env3	Env4
BD_GZ_19W	BD_NM_19W	IN_CU_19W	PH_LB_19W	IN_MA_19W
BD_NM_19W	BD_GZ_19W	IN_CU_19W	IN_MA_19W	PH_LB_19W
IN_HY_18W	KE_MW_20W	IN_RP_19W	MZ_CK_20W	IN_HY_19W
IN_CU_19W	BD_GZ_19W	BD_NM_19W	IN_MA_19W	PH_LB_19W
IN_HY_19D	IN_HY_18W	MZ_CK_20W	PH_LB_19D	MZ_MP_20W
IN_HY_19W	TZ_DK_20W	IN_RP_19W	IN_CU_19W	IN_MA_19W
IN_MA_19W	IN_CU_19W	BD_NM_19W	BD_GZ_19W	PH_LB_19W
IN_RP_19W	IN_HY_19W	IN_CU_19W	BD_GZ_19W	TZ_DK_20W
KE_AH_19D	KE_MW_20W	MZ_MP_20W	PH_LB_19W	IN_RP_19W
KE_MW_20W	TZ_DK_20W	IN_RP_19W	IN_HY_18W	IN_HY_19W
MZ_CK_20W	MZ_MP_20W	IN_HY_18W	KE_MW_20W	IN_HY_19W
MZ_MP_20W	MZ_CK_20W	KE_MW_20W	KE_AH_19D	PH_LB_19D
PH_LB_19D	PH_LB_19W	MZ_MP_20W	IN_CU_19W	IN_HY_18W
PH_LB_19W	IN_CU_19W	BD_GZ_19W	IN_MA_19W	BD_NM_19W
TZ_DK_20W	IN_HY_19W	KE_MW_20W	IN_RP_19W	IN_CU_19W
Note:	At BD (Bangladesh), the trial environments were conducted at GZ (Gazipur), and NM (Nizmawna).
	At IN (India) conducted at HY (Hyderabad), CU (Cuttack), MA (Maruteru), and RP (Raipur).
	At KE (Kenya) conducted at AH (Ahero), and MW (Mwea).
	At MZ (Mozambique) conducted at CK (Chokwe), and MP (Maputo).
	At PH (Philippines) conducted at LB (Los Banos). At TZ (Tanzania) conducted at DK (Dakawa).

## Sheet: Table S6
Table S6 Analysis of variance (ANOVA) for the three traits
Source of variation	DTF						HT						YLD
	df	SS	MS	F-value	Pr(>F)		df	SS	MS	F-value	Pr(>F)		df	SS	MS	F-value	Pr(>F)
ENV	14	185018	13215.6	137.5	9.15e-12	***	14	487449	34817.8	150.224	5.18e-12	***	14	1174.29	83.8781	40.3814	2.18e-08	***
REP(ENV)	13	1249.6	96.1	8.8	4.72e-17	***	13	3013	231.8	5.0369	1.28e-08	***	13	27.0029	2.07715	4.8105	4e-08	***
GEN	110	34822.4	316.6	29	5.24e-217	***	110	70390.4	639.9	13.9067	1.07e-126	***	110	295.545	2.68678	6.22235	7.31e-56	***
GEN:ENV	974	26984.4	27.7	2.5	1.13e-41	***	974	64431.1	66.2	1.4376	4.12e-08	***	974	791.738	0.812872	1.88255	1.01e-20	***
Residuals	816	8898.1	10.9				816	37548.1	46				816	352.344	0.431794
Total	3467	287860	83				3467	742521	214.2				3467	3596.46	1.03734
Note:	ENV: environmental effects; REP(ENV): Replications nested within environments; GEN: genotype effects; GEN:ENV: genotype by environment interaction effects; df: degree of freedom; SS: sum of squares; MS: mean squares

## Sheet: Table S7
Table S7 The predictive abilities for the DTF, HT, and YLD traits for the CV-RAN scenario
No.	Country	Location	Year-Season	DTF
				G		GE		GW		GEW		GE-GxE		GW-GxW		GEW-GxE-GxW
				Range	Mean	Range	Mean	Range	Mean	Range	Mean	Range	Mean	Range	Mean	Range	Mean
1	Bangladesh	Gazipur	2019-Wet	0.29-0.63	0.41	0.32-0.64	0.48	0.32-0.64	0.48	0.33-0.64	0.48	0.33-0.65	0.5	0.23-0.69	0.47	0.26-0.68	0.49
2	Bangladesh	Nizmawna	2019-Wet	0.25-0.64	0.44	0.34-0.73	0.52	0.34-0.73	0.52	0.34-0.73	0.52	0.36-0.73	0.53	0.33-0.76	0.56	0.36-0.75	0.56
3	India	Hyderabad	2018-Wet	0.45-0.69	0.58	0.58-0.74	0.67	0.59-0.74	0.67	0.58-0.74	0.67	0.58-0.74	0.67	0.45-0.73	0.65	0.52-0.74	0.66
4	India	Cuttack	2019-Wet	0.2-0.68	0.41	0.27-0.67	0.46	0.27-0.67	0.46	0.27-0.67	0.46	0.28-0.68	0.46	0.23-0.71	0.5	0.28-0.71	0.5
5	India	Hyderabad	2019-Dry	0.39-0.81	0.65	0.45-0.79	0.63	0.45-0.79	0.63	0.45-0.79	0.63	0.44-0.8	0.62	-0.02-0.79	0.55	0.24-0.8	0.59
6	India	Hyderabad	2019-Wet	0.31-0.6	0.46	0.38-0.62	0.53	0.38-0.62	0.53	0.38-0.61	0.52	0.37-0.61	0.53	0.34-0.6	0.5	0.35-0.61	0.51
7	India	Maruteru	2019-Wet	0.27-0.47	0.38	0.33-0.55	0.45	0.33-0.55	0.45	0.32-0.55	0.45	0.35-0.55	0.46	0.29-0.61	0.44	0.33-0.62	0.46
8	India	Raipur	2019-Wet	0.18-0.6	0.4	0.28-0.63	0.47	0.28-0.63	0.46	0.28-0.62	0.46	0.3-0.63	0.47	0.31-0.71	0.5	0.31-0.71	0.5
9	Kenya	Ahero	2019-Dry	0.01-0.35	0.2	0.1-0.37	0.19	0.1-0.37	0.2	0.1-0.36	0.2	0.11-0.38	0.21	0.06-0.36	0.21	0.05-0.37	0.22
10	Kenya	Mwea	2020-Wet	-0.02-0.71	0.55	0.32-0.71	0.59	0.32-0.72	0.59	0.32-0.72	0.59	0.32-0.72	0.58	0.27-0.73	0.57	0.3-0.72	0.58
11	Mozambique	Chokwe	2020-Wet	0.02-0.53	0.26	0.07-0.57	0.39	0.07-0.57	0.39	0.07-0.56	0.39	0.1-0.56	0.4	0.1-0.57	0.38	0.11-0.56	0.39
12	Mozambique	Maputo	2020-Wet	0.03-0.65	0.51	0.27-0.73	0.59	0.27-0.73	0.59	0.28-0.73	0.59	0.28-0.73	0.58	0.25-0.71	0.57	0.28-0.72	0.58
13	Philippines	Los Banos	2019-Dry	0.15-0.74	0.51	0.25-0.82	0.6	0.25-0.83	0.6	0.25-0.82	0.6	0.24-0.84	0.59	0.12-0.78	0.57	0.24-0.82	0.58
14	Philippines	Los Banos	2019-Wet	0.13-0.53	0.35	0.17-0.65	0.46	0.17-0.65	0.46	0.16-0.65	0.46	0.19-0.66	0.47	0.14-0.65	0.43	0.15-0.66	0.44
15	Tanzania	Dakawa	2020-Wet	0.23-0.74	0.56	0.28-0.78	0.65	0.28-0.79	0.65	0.28-0.79	0.65	0.29-0.78	0.65	0.08-0.73	0.52	0.3-0.75	0.56
No.	Country	Location	Year-Season	HT
				G		GE		GW		GEW		GE-GxE		GW-GxW		GEW-GxE-GxW
				Range	Mean	Range	Mean	Range	Mean	Range	Mean	Range	Mean	Range	Mean	Range	Mean
1	Bangladesh	Gazipur	2019-Wet	0.14-0.61	0.46	0.44-0.65	0.58	0.44-0.65	0.58	0.44-0.65	0.58	0.44-0.65	0.58	0.42-0.64	0.53	0.41-0.64	0.54
2	Bangladesh	Nizmawna	2019-Wet	0.47-0.72	0.61	0.57-0.72	0.65	0.57-0.72	0.65	0.57-0.72	0.65	0.56-0.71	0.65	0.47-0.71	0.62	0.49-0.71	0.63
3	India	Hyderabad	2018-Wet	0.66-0.87	0.77	0.73-0.88	0.83	0.73-0.88	0.83	0.73-0.88	0.83	0.73-0.88	0.83	0.5-0.88	0.8	0.54-0.87	0.81
4	India	Cuttack	2019-Wet	0.46-0.7	0.57	0.55-0.75	0.66	0.55-0.75	0.66	0.55-0.75	0.66	0.56-0.75	0.66	0.47-0.73	0.63	0.5-0.74	0.64
5	India	Hyderabad	2019-Dry	0.6-0.79	0.68	0.65-0.81	0.74	0.65-0.81	0.74	0.65-0.81	0.74	0.64-0.81	0.74	0.23-0.82	0.64	0.43-0.83	0.67
6	India	Hyderabad	2019-Wet	0.26-0.4	0.34	0.27-0.44	0.36	0.27-0.44	0.36	0.27-0.44	0.36	0.27-0.44	0.36	0.27-0.43	0.37	0.27-0.44	0.36
7	India	Maruteru	2019-Wet	0.34-0.63	0.46	0.39-0.63	0.54	0.4-0.63	0.54	0.39-0.63	0.54	0.4-0.64	0.54	0.27-0.63	0.54	0.3-0.64	0.55
8	India	Raipur	2019-Wet	0.53-0.76	0.66	0.63-0.84	0.75	0.63-0.84	0.75	0.63-0.84	0.75	0.63-0.85	0.76	0.58-0.84	0.74	0.59-0.84	0.75
9	Kenya	Ahero	2019-Dry	0.14-0.36	0.3	0.29-0.45	0.37	0.28-0.45	0.37	0.29-0.45	0.37	0.32-0.46	0.39	0.22-0.45	0.36	0.23-0.46	0.37
10	Kenya	Mwea	2020-Wet	0.22-0.63	0.51	0.44-0.65	0.59	0.44-0.65	0.59	0.45-0.65	0.59	0.45-0.65	0.58	0.25-0.65	0.57	0.35-0.65	0.57
11	Mozambique	Chokwe	2020-Wet	0.23-0.59	0.47	0.39-0.61	0.54	0.39-0.62	0.54	0.39-0.62	0.54	0.39-0.62	0.54	-0.31-0.61	0.51	-0.28-0.61	0.52
12	Mozambique	Maputo	2020-Wet	0.33-0.63	0.52	0.36-0.69	0.57	0.36-0.69	0.57	0.37-0.69	0.57	0.36-0.69	0.56	-0.56-0.65	0.54	-0.53-0.67	0.54
13	Philippines	Los Banos	2019-Dry	0.08-0.62	0.42	0.33-0.71	0.57	0.33-0.71	0.57	0.34-0.71	0.57	0.34-0.72	0.56	0.13-0.69	0.54	0.18-0.7	0.55
14	Philippines	Los Banos	2019-Wet	0.09-0.45	0.28	0.24-0.51	0.37	0.24-0.51	0.37	0.24-0.51	0.37	0.24-0.51	0.37	0.22-0.5	0.35	0.22-0.5	0.35
15	Tanzania	Dakawa	2020-Wet	0.33-0.59	0.49	0.45-0.72	0.62	0.45-0.72	0.62	0.45-0.72	0.62	0.45-0.72	0.62	0.34-0.69	0.57	0.37-0.69	0.58
No.	Country	Location	Year-Season	YLD
				G		GE		GW		GEW		GE-GxE		GW-GxW		GEW-GxE-GxW
				Range	Mean	Range	Mean	Range	Mean	Range	Mean	Range	Mean	Range	Mean	Range	Mean
1	Bangladesh	Gazipur	2019-Wet	-0.16-0.37	0.18	-0.14-0.4	0.21	-0.14-0.41	0.21	-0.15-0.41	0.2	-0.13-0.4	0.17	-0.35-0.42	0.12	-0.34-0.42	0.13
2	Bangladesh	Nizmawna	2019-Wet	-0.13-0.05	-0.04	-0.17-0.05	-0.05	-0.17-0.05	-0.05	-0.17-0.04	-0.05	-0.2-0.05	-0.06	-0.15-0.11	-0.01	-0.13-0.13	-0.01
3	India	Hyderabad	2018-Wet	-0.34-0.56	0.22	-0.36-0.6	0.23	-0.36-0.6	0.23	-0.36-0.6	0.23	-0.33-0.61	0.25	-0.04-0.69	0.45	-0.2-0.69	0.45
4	India	Cuttack	2019-Wet	-0.01-0.32	0.17	-0.06-0.3	0.16	-0.05-0.3	0.16	-0.07-0.3	0.16	0-0.31	0.16	-0.14-0.26	0.09	-0.12-0.26	0.09
5	India	Hyderabad	2019-Dry	-0.26-0.46	0.15	-0.26-0.46	0.16	-0.26-0.45	0.16	-0.27-0.46	0.16	-0.24-0.44	0.18	-0.33-0.48	0.18	-0.28-0.46	0.17
6	India	Hyderabad	2019-Wet	-0.32-0.58	0.24	-0.35-0.61	0.25	-0.34-0.61	0.25	-0.35-0.61	0.25	-0.31-0.61	0.29	-0.4-0.54	0.17	-0.38-0.58	0.18
7	India	Maruteru	2019-Wet	-0.22-0.25	0.02	-0.2-0.29	0.05	-0.21-0.28	0.04	-0.2-0.29	0.04	-0.21-0.25	0.02	-0.22-0.36	0.01	-0.22-0.36	0.02
8	India	Raipur	2019-Wet	-0.14-0.42	0.22	-0.14-0.43	0.23	-0.14-0.43	0.23	-0.16-0.43	0.23	-0.12-0.44	0.26	-0.21-0.42	0.16	-0.27-0.43	0.15
9	Kenya	Ahero	2019-Dry	-0.18-0.21	0.01	-0.23-0.21	0.02	-0.23-0.21	0.02	-0.23-0.21	0.02	-0.24-0.21	0	-0.26-0.32	0.07	-0.27-0.4	0.06
10	Kenya	Mwea	2020-Wet	0.04-0.39	0.22	0.05-0.4	0.23	0.06-0.4	0.23	0.06-0.4	0.23	0.04-0.41	0.23	-0.26-0.4	0.14	-0.24-0.42	0.16
11	Mozambique	Chokwe	2020-Wet	-0.05-0.55	0.25	0.07-0.56	0.31	0.07-0.56	0.32	0.06-0.56	0.31	0.09-0.55	0.29	-0.29-0.47	0.09	-0.33-0.48	0.09
12	Mozambique	Maputo	2020-Wet	-0.09-0.23	0.08	-0.16-0.22	0.06	-0.16-0.22	0.06	-0.16-0.22	0.06	-0.15-0.24	0.07	-0.2-0.21	0.03	-0.21-0.24	0.03
13	Philippines	Los Banos	2019-Dry	0.01-0.5	0.28	0.06-0.52	0.32	0.06-0.53	0.32	0.06-0.52	0.31	0.04-0.51	0.29	-0.31-0.42	0.12	-0.33-0.43	0.14
14	Philippines	Los Banos	2019-Wet	-0.16-0.44	0.09	-0.14-0.54	0.13	-0.14-0.54	0.13	-0.15-0.54	0.12	-0.14-0.55	0.08	-0.26-0.55	0.16	-0.16-0.52	0.16
15	Tanzania	Dakawa	2020-Wet	-0.18-0.34	0.08	-0.24-0.37	0.09	-0.24-0.37	0.09	-0.24-0.37	0.08	-0.23-0.35	0.07	-0.26-0.44	0.02	-0.24-0.46	0.04

## Sheet: Table S8
Table S8 The predictive abilities for the DTF, HT, and YLD traits for the CV-SEL scenario
				Whole dataset (unbalanced)								Balanced dataset with the lines (33) evaluated across all environments
No.	Country	Location	Year-Season	DTF								DTF
				G	GE	GW	GEW	GE-GxE	GW-GxW	GEW-GxE-GxW		G	GE	GW	GEW	GE-GxE	GW-GxW	GEW-GxE-GxW
1	Bangladesh	Gazipur	2019-Wet	0.6	0.65	0.65	0.65	0.65	0.64	0.65		0.68	0.81	0.81	0.81	0.82	0.73	0.77
2	Bangladesh	Nizmawna	2019-Wet	0.71	0.75	0.75	0.75	0.76	0.75	0.76		0.83	0.84	0.85	0.85	0.85	0.83	0.84
3	India	Hyderabad	2018-Wet	0.7	0.78	0.78	0.78	0.79	0.67	0.74		0.73	0.79	0.78	0.79	0.79	0.73	0.76
4	India	Cuttack	2019-Wet	0.48	0.49	0.49	0.49	0.5	0.5	0.5		0.56	0.53	0.53	0.53	0.53	0.54	0.54
5	India	Hyderabad	2019-Dry	0.72	0.65	0.65	0.65	0.65	0.06	0.43		0.68	0.65	0.65	0.65	0.66	-0.03	0.36
6	India	Hyderabad	2019-Wet	0.41	0.53	0.53	0.53	0.51	0.48	0.5		0.38	0.45	0.45	0.45	0.47	0.43	0.47
7	India	Maruteru	2019-Wet	0.55	0.56	0.56	0.56	0.56	0.51	0.54		0.48	0.56	0.56	0.56	0.56	0.53	0.56
8	India	Raipur	2019-Wet	0.57	0.59	0.59	0.59	0.59	0.5	0.53		0.62	0.59	0.58	0.59	0.59	0.48	0.53
9	Kenya	Ahero	2019-Dry	0.22	0.2	0.2	0.2	0.22	0.2	0.21		0.38	0.44	0.44	0.44	0.43	0.45	0.45
10	Kenya	Mwea	2020-Wet	0.6	0.63	0.63	0.64	0.64	0.66	0.66		0.79	0.81	0.81	0.81	0.81	0.85	0.84
11	Mozambique	Chokwe	2020-Wet	0.42	0.45	0.45	0.44	0.45	0.49	0.48		0.47	0.5	0.5	0.49	0.5	0.53	0.52
12	Mozambique	Maputo	2020-Wet	0.6	0.69	0.69	0.69	0.68	0.66	0.68		0.71	0.76	0.76	0.76	0.76	0.75	0.75
13	Philippines	Los Banos	2019-Dry	0.6	0.69	0.69	0.69	0.67	0.7	0.68		0.64	0.7	0.69	0.69	0.7	0.75	0.75
14	Philippines	Los Banos	2019-Wet	0.42	0.48	0.48	0.48	0.48	0.46	0.48		0.52	0.56	0.56	0.56	0.57	0.5	0.54
15	Tanzania	Dakawa	2020-Wet	0.52	0.57	0.57	0.58	0.54	0.54	0.53		0.6	0.66	0.65	0.66	0.65	0.68	0.68
No.	Country	Location	Year-Season	HT								HT
				G	GE	GW	GEW	GE-GxE	GW-GxW	GEW-GxE-GxW		G	GE	GW	GEW	GE-GxE	GW-GxW	GEW-GxE-GxW
1	Bangladesh	Gazipur	2019-Wet	0.51	0.53	0.53	0.53	0.53	0.54	0.54		0.7	0.71	0.71	0.71	0.71	0.72	0.72
2	Bangladesh	Nizmawna	2019-Wet	0.71	0.7	0.7	0.7	0.69	0.67	0.68		0.79	0.8	0.79	0.79	0.79	0.81	0.8
3	India	Hyderabad	2018-Wet	0.75	0.81	0.81	0.81	0.81	0.83	0.84		0.73	0.8	0.8	0.8	0.8	0.81	0.83
4	India	Cuttack	2019-Wet	0.62	0.63	0.63	0.63	0.63	0.63	0.63		0.66	0.69	0.69	0.69	0.69	0.69	0.69
5	India	Hyderabad	2019-Dry	0.65	0.75	0.74	0.74	0.74	0.75	0.77		0.68	0.77	0.77	0.77	0.77	0.72	0.79
6	India	Hyderabad	2019-Wet	0.35	0.34	0.34	0.34	0.35	0.32	0.34		0.4	0.33	0.33	0.33	0.33	0.3	0.32
7	India	Maruteru	2019-Wet	0.61	0.61	0.61	0.61	0.62	0.63	0.64		0.63	0.64	0.63	0.64	0.65	0.66	0.65
8	India	Raipur	2019-Wet	0.72	0.76	0.75	0.75	0.75	0.68	0.71		0.67	0.72	0.72	0.71	0.72	0.68	0.69
9	Kenya	Ahero	2019-Dry	0.25	0.35	0.35	0.35	0.36	0.34	0.36		0.36	0.43	0.43	0.43	0.43	0.37	0.38
10	Kenya	Mwea	2020-Wet	0.58	0.58	0.58	0.58	0.56	0.6	0.59		0.67	0.72	0.72	0.72	0.73	0.74	0.74
11	Mozambique	Chokwe	2020-Wet	0.44	0.49	0.49	0.49	0.5	0.49	0.48		0.55	0.53	0.53	0.53	0.51	0.54	0.55
12	Mozambique	Maputo	2020-Wet	0.58	0.62	0.61	0.61	0.61	0.6	0.61		0.56	0.51	0.51	0.51	0.5	0.5	0.49
13	Philippines	Los Banos	2019-Dry	0.45	0.59	0.59	0.58	0.57	0.57	0.58		0.45	0.54	0.54	0.54	0.53	0.55	0.51
14	Philippines	Los Banos	2019-Wet	0.38	0.39	0.39	0.39	0.39	0.38	0.38		0.46	0.46	0.46	0.45	0.45	0.46	0.45
15	Tanzania	Dakawa	2020-Wet	0.38	0.55	0.54	0.54	0.53	0.49	0.49		0.55	0.64	0.64	0.64	0.64	0.62	0.63
No.	Country	Location	Year-Season	YLD								YLD
				G	GE	GW	GEW	GE-GxE	GW-GxW	GEW-GxE-GxW		G	GE	GW	GEW	GE-GxE	GW-GxW	GEW-GxE-GxW
1	Bangladesh	Gazipur	2019-Wet	0.34	0.38	0.38	0.38	0.33	0.01	0.04		0.47	0.47	0.49	0.49	0.46	0.08	0.16
2	Bangladesh	Nizmawna	2019-Wet	0.04	0.03	0.03	0.03	0.02	0.11	0.07		0.01	0	0.01	-0.02	0.02	0.09	0.17
3	India	Hyderabad	2018-Wet	0.62	0.6	0.6	0.6	0.62	-0.29	0.24		0.68	0.68	0.69	0.68	0.65	-0.48	0.25
4	India	Cuttack	2019-Wet	0.07	0.07	0.08	0.06	0.1	0.12	0.07		-0.04	-0.02	-0.03	-0.04	0.05	0.36	0.26
5	India	Hyderabad	2019-Dry	0.29	0.29	0.29	0.29	0.3	0.27	0.32		0.41	0.36	0.36	0.36	0.33	-0.09	0.04
6	India	Hyderabad	2019-Wet	0.02	0.01	0.03	0	0.1	-0.09	-0.02		0.13	0.15	0.14	0.15	0.12	-0.16	-0.18
7	India	Maruteru	2019-Wet	0.03	0.05	0.04	0.05	0.01	0.06	0.09		-0.07	-0.06	-0.05	-0.06	-0.06	0.07	0
8	India	Raipur	2019-Wet	0.29	0.32	0.32	0.33	0.33	0.38	0.37		0.41	0.4	0.4	0.42	0.35	0.33	0.42
9	Kenya	Ahero	2019-Dry	0.15	0.16	0.17	0.17	0.19	0.1	0.1		0.05	0.07	0.08	0.06	0.13	0	-0.02
10	Kenya	Mwea	2020-Wet	0.31	0.34	0.35	0.34	0.34	-0.13	0.32		0.45	0.46	0.46	0.46	0.51	0.6	0.6
11	Mozambique	Chokwe	2020-Wet	0.07	0.18	0.18	0.17	0.17	-0.24	-0.18		0.08	0.1	0.1	0.09	0.1	0.16	0.17
12	Mozambique	Maputo	2020-Wet	0.04	0	0	0	-0.01	-0.01	-0.01		0.33	0.3	0.3	0.3	0.3	0.29	0.29
13	Philippines	Los Banos	2019-Dry	0.43	0.47	0.46	0.45	0.44	-0.02	-0.01		0.31	0.34	0.34	0.31	0.41	-0.03	0.01
14	Philippines	Los Banos	2019-Wet	0.2	0.22	0.22	0.24	0.17	-0.22	-0.2		0.21	0.19	0.2	0.19	0.2	-0.16	-0.19
15	Tanzania	Dakawa	2020-Wet	0.03	-0.05	-0.05	-0.06	-0.02	-0.14	-0.11		-0.05	-0.05	-0.03	-0.04	0.02	-0.06	-0.01
Note:
	- Models are used including:
		G	y = u + g + ε
		GE	y = u + g + e + ε
		GE-GxE	y = u + g + e + ge + ε
		GW	y = u + g + w + ε
		GW-GxW	y = u + g + w + gw + ε
		GEW	y = u + g + e + w + ε
		GEW-GxE	y = u + g + e + w + ge + ε
		GEW-GxW	y = u + g + e + w + gw + ε
		GEW-GxE-GxW	y = u + g + e + w + ge + gw + ε
	- For prediction models adding the W-related main effects, the prediction is used 24-ECs obtained from three developmental phase (Vegetative, Reproductive, Ripen phases)

## Sheet: Table S9
Table S9 The predictive abilities for the DTF, HT, and YLD traits for the CV-LOEO scenario
				Whole dataset (unbalanced)								Balanced dataset with the lines (33) evaluated across all environments
No.	Country	Location	Year-Season	DTF								DTF
				G	GE	GW	GEW	GE-GxE	GW-GxW	GEW-GxE-GxW		G	GE	GW	GEW	GE-GxE	GW-GxW	GEW-GxE-GxW
1	Bangladesh	Gazipur	2019-Wet	0.5	0.58	0.58	0.58	0.59	0.65	0.65		0.59	0.76	0.77	0.77	0.79	0.82	0.81
2	Bangladesh	Nizmawna	2019-Wet	0.53	0.61	0.61	0.61	0.62	0.76	0.73		0.61	0.67	0.68	0.69	0.69	0.83	0.82
3	India	Hyderabad	2018-Wet	0.64	0.74	0.75	0.74	0.75	0.72	0.75		0.61	0.77	0.76	0.76	0.76	0.74	0.76
4	India	Cuttack	2019-Wet	0.45	0.51	0.52	0.51	0.53	0.57	0.57		0.46	0.5	0.48	0.49	0.49	0.56	0.56
5	India	Hyderabad	2019-Dry	0.72	0.66	0.66	0.66	0.65	0.45	0.6		0.65	0.68	0.67	0.67	0.66	0.52	0.65
6	India	Hyderabad	2019-Wet	0.52	0.59	0.59	0.59	0.59	0.6	0.6		0.42	0.51	0.53	0.51	0.49	0.54	0.5
7	India	Maruteru	2019-Wet	0.44	0.52	0.52	0.52	0.53	0.51	0.54		0.45	0.58	0.59	0.57	0.58	0.57	0.59
8	India	Raipur	2019-Wet	0.44	0.54	0.54	0.54	0.54	0.6	0.59		0.53	0.54	0.54	0.55	0.56	0.57	0.55
9	Kenya	Ahero	2019-Dry	0.22	0.18	0.18	0.18	0.2	0.21	0.21		0.48	0.53	0.52	0.5	0.49	0.47	0.5
10	Kenya	Mwea	2020-Wet	0.67	0.64	0.65	0.65	0.64	0.71	0.69		0.78	0.78	0.76	0.75	0.78	0.81	0.79
11	Mozambique	Chokwe	2020-Wet	0.39	0.53	0.53	0.53	0.54	0.48	0.5		0.2	0.45	0.45	0.46	0.49	0.48	0.48
12	Mozambique	Maputo	2020-Wet	0.63	0.71	0.71	0.71	0.7	0.69	0.7		0.66	0.71	0.69	0.7	0.69	0.75	0.72
13	Philippines	Los Banos	2019-Dry	0.63	0.74	0.74	0.73	0.73	0.73	0.73		0.65	0.77	0.77	0.77	0.78	0.82	0.86
14	Philippines	Los Banos	2019-Wet	0.44	0.6	0.6	0.6	0.61	0.62	0.63		0.42	0.65	0.65	0.64	0.66	0.68	0.62
15	Tanzania	Dakawa	2020-Wet	0.67	0.77	0.77	0.77	0.76	0.69	0.7		0.75	0.81	0.82	0.81	0.81	0.74	0.73
No.	Country	Location	Year-Season	HT								HT
				G	GE	GW	GEW	GE-GxE	GW-GxW	GEW-GxE-GxW		G	GE	GW	GEW	GE-GxE	GW-GxW	GEW-GxE-GxW
1	Bangladesh	Gazipur	2019-Wet	0.53	0.65	0.65	0.65	0.66	0.63	0.63		0.65	0.75	0.75	0.74	0.76	0.75	0.75
2	Bangladesh	Nizmawna	2019-Wet	0.7	0.7	0.7	0.7	0.69	0.71	0.7		0.74	0.81	0.8	0.81	0.81	0.79	0.81
3	India	Hyderabad	2018-Wet	0.8	0.87	0.87	0.87	0.87	0.87	0.88		0.77	0.88	0.88	0.88	0.86	0.88	0.88
4	India	Cuttack	2019-Wet	0.61	0.7	0.7	0.7	0.7	0.68	0.69		0.64	0.75	0.75	0.74	0.74	0.73	0.75
5	India	Hyderabad	2019-Dry	0.73	0.79	0.79	0.79	0.79	0.74	0.76		0.7	0.81	0.81	0.81	0.83	0.8	0.79
6	India	Hyderabad	2019-Wet	0.34	0.38	0.38	0.38	0.38	0.38	0.38		0.46	0.38	0.37	0.37	0.38	0.35	0.37
7	India	Maruteru	2019-Wet	0.48	0.6	0.59	0.6	0.6	0.6	0.6		0.44	0.61	0.61	0.61	0.6	0.57	0.59
8	India	Raipur	2019-Wet	0.7	0.82	0.82	0.82	0.82	0.8	0.81		0.68	0.85	0.84	0.84	0.84	0.82	0.81
9	Kenya	Ahero	2019-Dry	0.34	0.41	0.41	0.41	0.42	0.39	0.4		0.41	0.55	0.54	0.55	0.56	0.54	0.54
10	Kenya	Mwea	2020-Wet	0.59	0.64	0.64	0.64	0.63	0.64	0.64		0.7	0.73	0.75	0.74	0.72	0.76	0.77
11	Mozambique	Chokwe	2020-Wet	0.55	0.61	0.61	0.61	0.61	0.61	0.61		0.64	0.64	0.64	0.64	0.63	0.65	0.66
12	Mozambique	Maputo	2020-Wet	0.61	0.64	0.64	0.64	0.63	0.64	0.64		0.62	0.55	0.56	0.56	0.52	0.55	0.52
13	Philippines	Los Banos	2019-Dry	0.51	0.68	0.68	0.68	0.67	0.71	0.7		0.53	0.65	0.68	0.68	0.66	0.71	0.69
14	Philippines	Los Banos	2019-Wet	0.35	0.45	0.46	0.45	0.45	0.48	0.47		0.46	0.49	0.47	0.48	0.46	0.47	0.48
15	Tanzania	Dakawa	2020-Wet	0.57	0.72	0.72	0.72	0.71	0.63	0.66		0.57	0.8	0.78	0.77	0.78	0.75	0.74
No.	Country	Location	Year-Season	YLD								YLD
				G	GE	GW	GEW	GE-GxE	GW-GxW	GEW-GxE-GxW		G	GE	GW	GEW	GE-GxE	GW-GxW	GEW-GxE-GxW
1	Bangladesh	Gazipur	2019-Wet	0.25	0.31	0.31	0.31	0.25	0.29	0.27		0.06	0.14	0.11	0.11	0.23	0.31	0.36
2	Bangladesh	Nizmawna	2019-Wet	-0.06	-0.08	-0.08	-0.08	-0.1	-0.03	-0.08		-0.15	-0.13	-0.08	-0.11	-0.02	-0.06	0.02
3	India	Hyderabad	2018-Wet	0.3	0.31	0.31	0.31	0.36	0.58	0.57		0.59	0.44	0.5	0.5	0.08	0.6	0.53
4	India	Cuttack	2019-Wet	0.24	0.21	0.22	0.21	0.22	0.22	0.21		0.12	0.14	0.16	0.23	0.1	0.03	-0.01
5	India	Hyderabad	2019-Dry	0.25	0.25	0.25	0.25	0.3	0.38	0.37		0.5	0.4	0.41	0.38	-0.02	0.43	0.52
6	India	Hyderabad	2019-Wet	0.41	0.41	0.41	0.41	0.48	0.12	0.25		0.52	0.47	0.48	0.5	0.37	0.2	0.19
7	India	Maruteru	2019-Wet	0.02	0.06	0.06	0.06	0.03	0.12	0.06		-0.12	-0.07	-0.08	-0.07	-0.03	0.03	-0.01
8	India	Raipur	2019-Wet	0.33	0.37	0.37	0.36	0.4	0.37	0.39		0.38	0.44	0.49	0.43	0.34	0.39	0.4
9	Kenya	Ahero	2019-Dry	0.03	0.08	0.07	0.07	0.04	0.17	0.15		-0.1	-0.11	-0.11	-0.03	-0.14	0.08	-0.02
10	Kenya	Mwea	2020-Wet	0.36	0.34	0.34	0.34	0.33	0.37	0.38		0.51	0.42	0.45	0.46	0.43	0.42	0.49
11	Mozambique	Chokwe	2020-Wet	0.4	0.46	0.46	0.46	0.41	0.17	0.19		0.17	0.28	0.24	0.24	0.32	0.15	0.36
12	Mozambique	Maputo	2020-Wet	0.1	0.04	0.04	0.05	0.07	0.03	0.04		0.27	0.28	0.32	0.32	0.17	0.35	0.37
13	Philippines	Los Banos	2019-Dry	0.41	0.46	0.46	0.46	0.43	0.38	0.39		0.48	0.46	0.51	0.47	0.24	0.34	0.03
14	Philippines	Los Banos	2019-Wet	0.19	0.24	0.24	0.24	0.14	0.32	0.3		-0.14	-0.04	-0.01	0	0.05	0.31	0.12
15	Tanzania	Dakawa	2020-Wet	0.07	0.12	0.12	0.12	0.06	0	-0.03		0.09	0.13	0.12	0.15	0.15	0.01	-0.01
Note:
	- Models are used including:
		G	y = u + g + ε
		GE	y = u + g + e + ε
		GE-GxE	y = u + g + e + ge + ε
		GW	y = u + g + w + ε
		GW-GxW	y = u + g + w + gw + ε
		GEW	y = u + g + e + w + ε
		GEW-GxE	y = u + g + e + w + ge + ε
		GEW-GxW	y = u + g + e + w + gw + ε
		GEW-GxE-GxW	y = u + g + e + w + ge + gw + ε
	- For prediction models adding the W-related main effects, the prediction is used 24-ECs obtained from three developmental phase (Vegetative, Reproductive, Ripen phases)

[truncated: 1 more sheets: Table S10]
